# Supplementary material for: Synthesis and characterization of an electron-deficient conjugated polymer based on pyridine-flanked diketopyrrolopyrrole
Source: Royal Society of Chemistry journal article supplement (doi:10.1039/d1ra00779c), 2021-01-01
Supplement: d1ra00779c1.pdf [file d1ra00779c1.pdf]

## Supporting Information

### Synthesis and Characterization of Electron-Deficient Conjugated Polymer Based on Pyridine-Flanked Diketopyrrolopyrrole

Jialin Yang, Li Yang, Qianqian Chen, Keke Guo, and Ji-Min Han\*

*State Key Laboratory of Explosion Science and Technology, Beijing Institute of Technology, 5 Zhongguancun South Street, Haidian District, Beijing, 100081, China.*

#### General procedures and experimental details

All chemical reagents were purchased and used as received unless otherwise indicated. All air and water sensitive reactions were performed under nitrogen atmosphere. Dichloromethane, tetrahydrofuran, toluene and *N,N*-Dimethylformamide were dried by a JC Meyer solvent drying system prior to use.

<sup>1</sup>H NMR and <sup>13</sup>C NMR spectra were recorded on Bruker ARX-400 (400 MHz). All chemical shifts were reported in parts per million (ppm). <sup>1</sup>H NMR chemical shifts were referenced to CDCl<sub>3</sub> (7.26 ppm) and <sup>13</sup>C NMR chemical shifts were referenced to CDCl<sub>3</sub> (77.16 ppm). Mass spectra were recorded on an AB Sciex-5800 MALDI-TOF mass spectrometer and a Bruker Solarix XR mass spectrometer. Elemental analyses were performed on Vario EL elemental analyzer. Molecular weights of the polymers were determined by gel permeation chromatography (GPC) performed on Polymer Laboratories PL-GPC220 at 150 °C using 1,2,4-trichlorobenzene (TCB) as eluent. Thermal gravity analyses (TGA) were carried out on a TA Instrument Q600 SDT analyzer, and a METTLER TOLEDO Instrument DSC822 calorimeter was used for differential scanning calorimetry (DSC) analysis. Absorption spectra were recorded on PerkinElmer Lambda 750 UV-vis spectrometer, and temperature-depending absorption spectra were recorded on Shimadzu UV3600Plus UV-vis-NIR spectrometer. The doping samples were encapsulated to avoid exposure to ambient air during measurement. Cyclic voltammetry (CV) was performed on BioLogic SP-300 workstation. Thin film measurements were carried out in acetonitrile containing 0.1 M *n*-Bu<sub>4</sub>NPF<sub>6</sub> as a supporting electrolyte. Glassy carbon electrode was used as a working electrode and a platinum wire as a counter electrode, and all potentials were recorded versus AgCl/Ag (saturated) as a reference electrode (scan rate: 50 mV s<sup>-1</sup>).

The geometries of P(PyDPP2OD-2Tz) and P(PyDPP2OD-2T) trimer were optimized at the B3LYP/6-311G (d, p) level, and the HOMOs and LUMOs were also calculated with the 6-311G(d, p) basis set, using the Gaussian 09 software package.

## Synthetic Route for Preparing Sn-2Tz

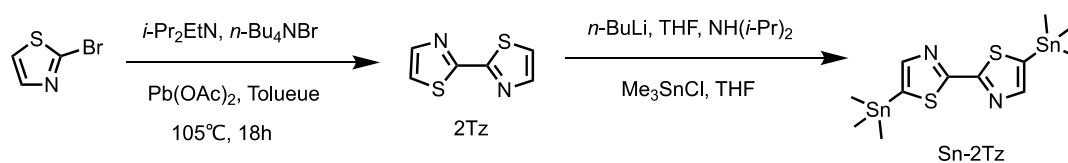

### Synthesis of 2Tz

2-bromothiazole (3.50 g, 21.34 mmol), N, N-diisopropylethylamine (2.76 g, 21.34 mmol), tetra-*n*-butylammonium bromide (6.88 g, 10.67 mmol), palladium acetate (0.35 g, 2.13 mmol) and toluene (14 mL) were added to a 50 mL Schlenk bottle in turn at  $-78^\circ\text{C}$  under nitrogen and warmed to room temperature. The reaction mixture was slowly warmed to  $105^\circ\text{C}$  and stirred for 18 h. After the reaction, deionized water was added to the reaction solution to quench and the resulting mixture was extracted with dichloromethane ( $50\text{ mL} \times 3$ ). The organic phase was combined, dried over anhydrous  $\text{Na}_2\text{SO}_4$  and concentrated. The residue was purified by column chromatography (petroleum ether/dichloromethane = 6:1) Pale yellow solid powder (970 mg, yield 54%) was obtained, which was compound 2Tz.  $^1\text{H}$  NMR (400 MHz,  $\text{CDCl}_3$ , ppm):  $\delta$  7.90 (d,  $J = 3.2\text{ Hz}$ , 2H), 7.45 (d,  $J = 0.008\text{ Hz}$ , 2H);  $^{13}\text{C}$  NMR (100 MHz,  $\text{CDCl}_3$ , ppm):  $\delta$  161.77, 144.06, 121.10; ESI MS calcd. For  $[\text{M} + \text{H}]^+$ : 168.0; Found: 169.0.

### Synthesis of Sn-2Tz

Under nitrogen protection, 3 mL of dry tetrahydrofuran (THF) was added to a 50 mL double-necked round bottom flask. After cooling to  $-78^\circ\text{C}$ ,  $n\text{-BuLi}$  (1.8 mL, 4.33 mmol) was added and  $\text{NH}(i\text{-Pr})_2$  (437.85 mg, 4.33 mmol) was added dropwise, stirring the reaction at  $-78^\circ\text{C}$  for 30 min to prepare the lithium diisopropylamide (LDA) solution. Under the protection of nitrogen, 2Tz (200 mg, 1.19 mmol) and 16 mL tetrahydrofuran (THF) were added to another 100 mL three-necked round bottom flask, and the reaction mixture was cool to  $-78^\circ\text{C}$ . One-third of the LDA solution prepared above was slowly added dropwise to the flask. The reaction solution turned orange-yellow. After stirring for 40 min at  $-78^\circ\text{C}$ ,  $\text{Me}_3\text{SnCl}$  solid (291.40 mg, 1.46 mmol) was added to the reaction system. Then another third of the LDA solution was slowly dripped and the reaction solution turned orange-red. After stirring the reaction at  $-78^\circ\text{C}$  for 40 minutes,  $\text{Me}_3\text{SnCl}$  solid (291.40 mg, 1.46 mmol) was added to the reaction system slowly. The last third of the LDA solution was added after 40 minutes, stirring the reaction at  $-78^\circ\text{C}$  for 40 min and  $\text{Me}_3\text{SnCl}$  solid (291.40 mg, 1.46 mmol) was added. Then the reaction mixture was warmed to room temperature and stirred for 2 h. After the reaction, the liquid was cooled, and deionized water was slowly added. a large amount of deionized water was added to quench the reaction if the reaction liquid had no reaction, and the reaction mixture was extracted with dichloromethane. The lower organic phase was dried over anhydrous  $\text{Na}_2\text{SO}_4$  and concentrated to obtain the crude yellow solid product. The product was purified by gel permeation chromatography (GPC) and concentrated to obtain a pale yellow powdered solid (389 mg, yield 66%), which is compound Sn-2Tz.  $^1\text{H}$  NMR (400 MHz,  $\text{CDCl}_3$ , ppm):  $\delta$  7.80

(s, 2H), 0.44 (s, 18H);  $^{13}\text{C}$  NMR (100 MHz,  $\text{CDCl}_3$ , ppm):  $\delta$  166.33, 150.23, 132.22, -7.88. ESI MS calcd. For  $[\text{M} - \text{H}]^-$ : 495.9; Found: 494.9.

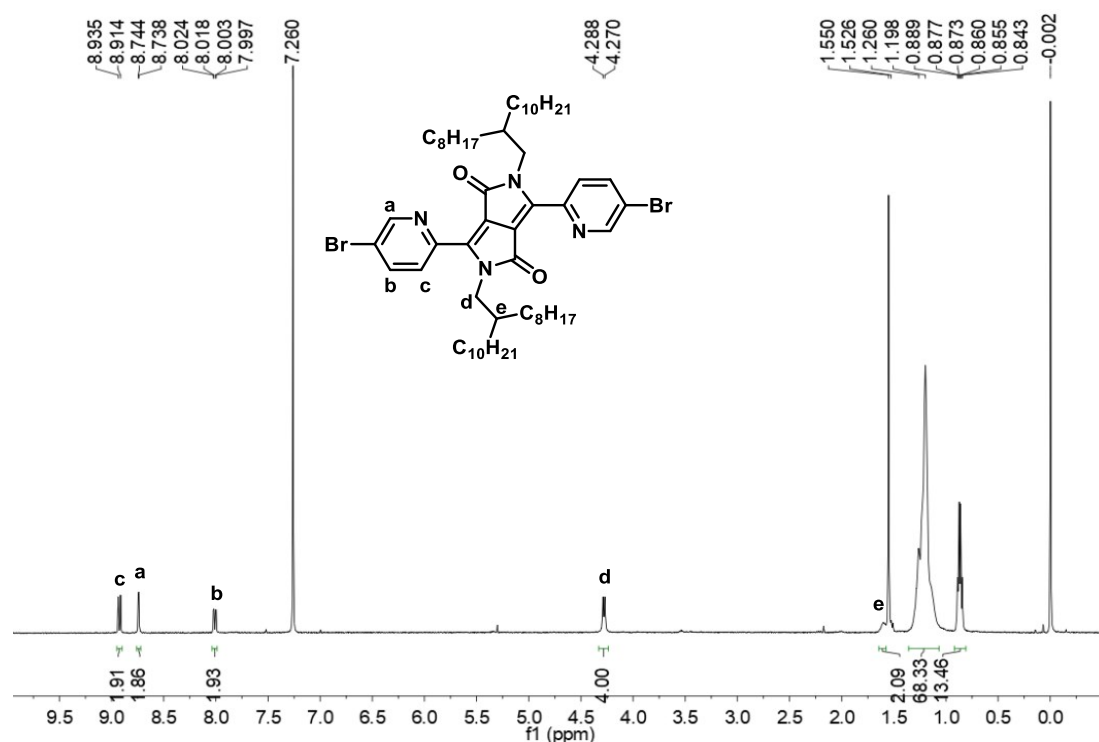

**Figure S1.**  $^1\text{H}$  NMR spectrum of PyDPP2OD in  $\text{CDCl}_3$

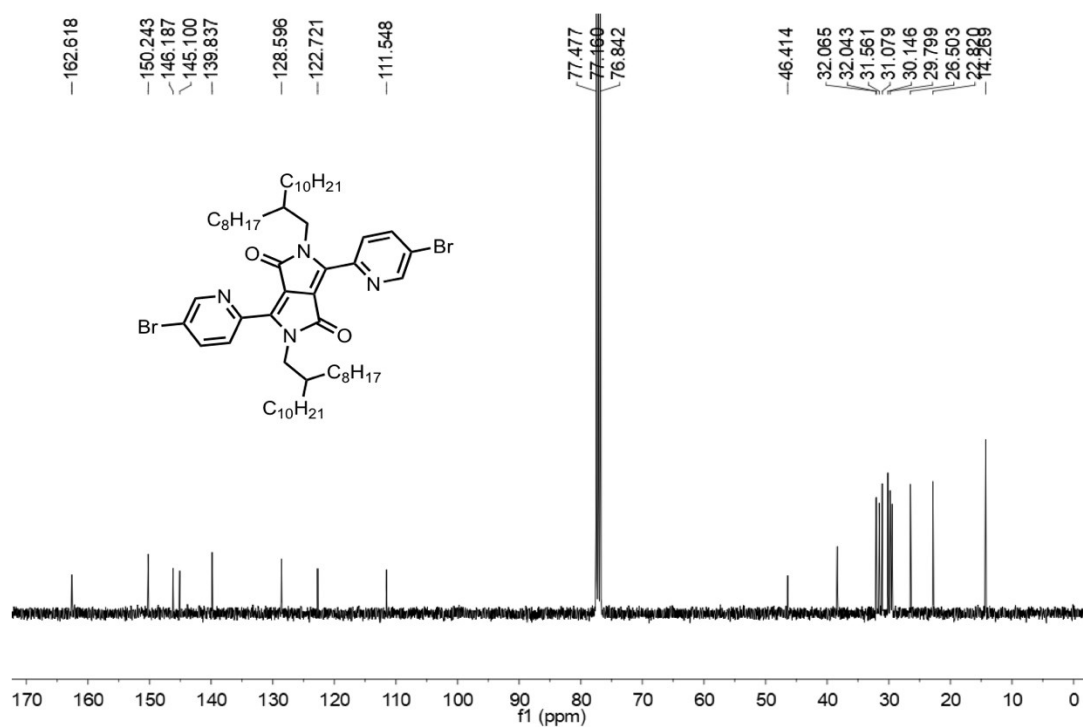

**Figure S2.**  $^{13}\text{C}$  NMR spectrum of PyDPP2OD in  $\text{CDCl}_3$

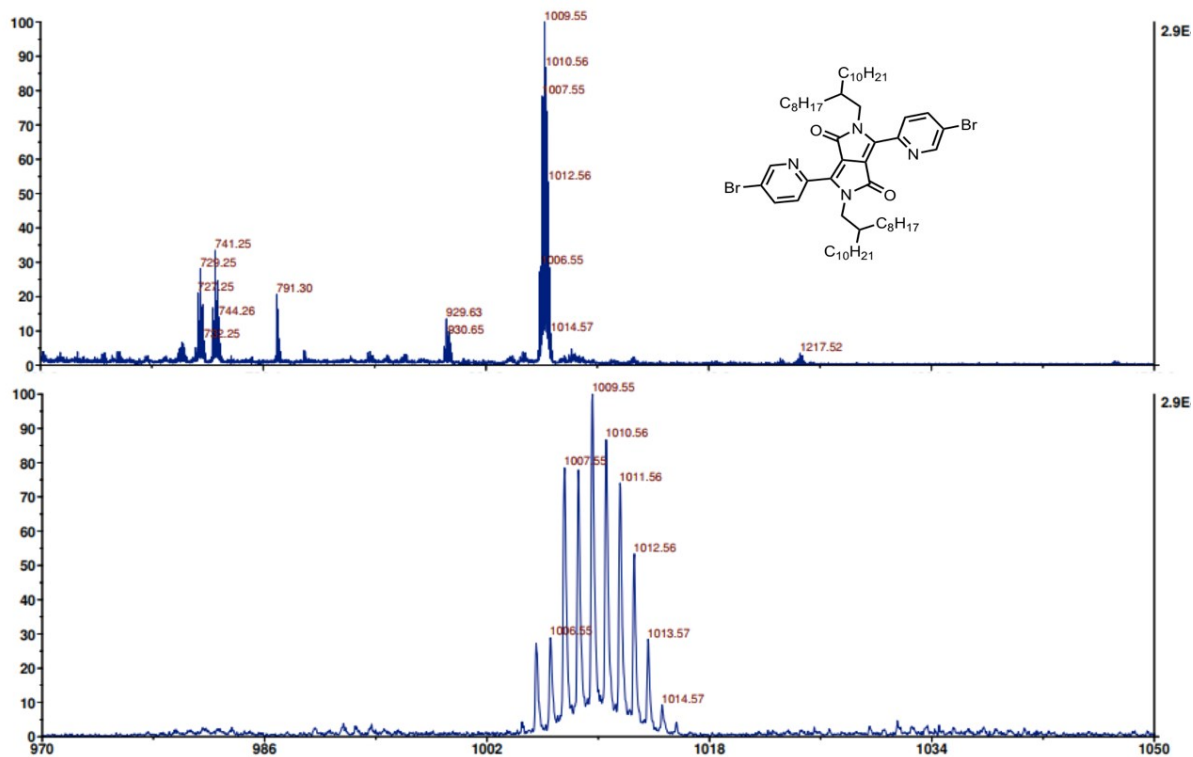

Figure S3. Mass spectrum of PDBPyBTz

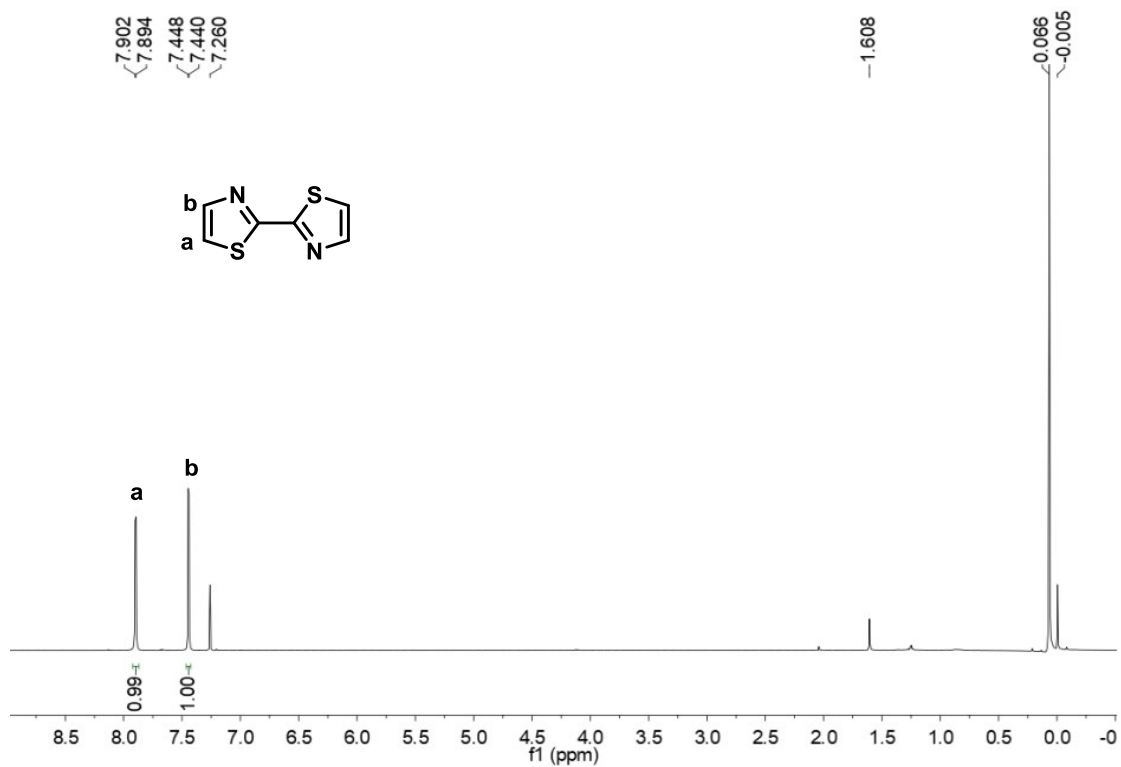

Figure S4. <sup>1</sup>H NMR spectrum of 2Tz in CDCl<sub>3</sub>

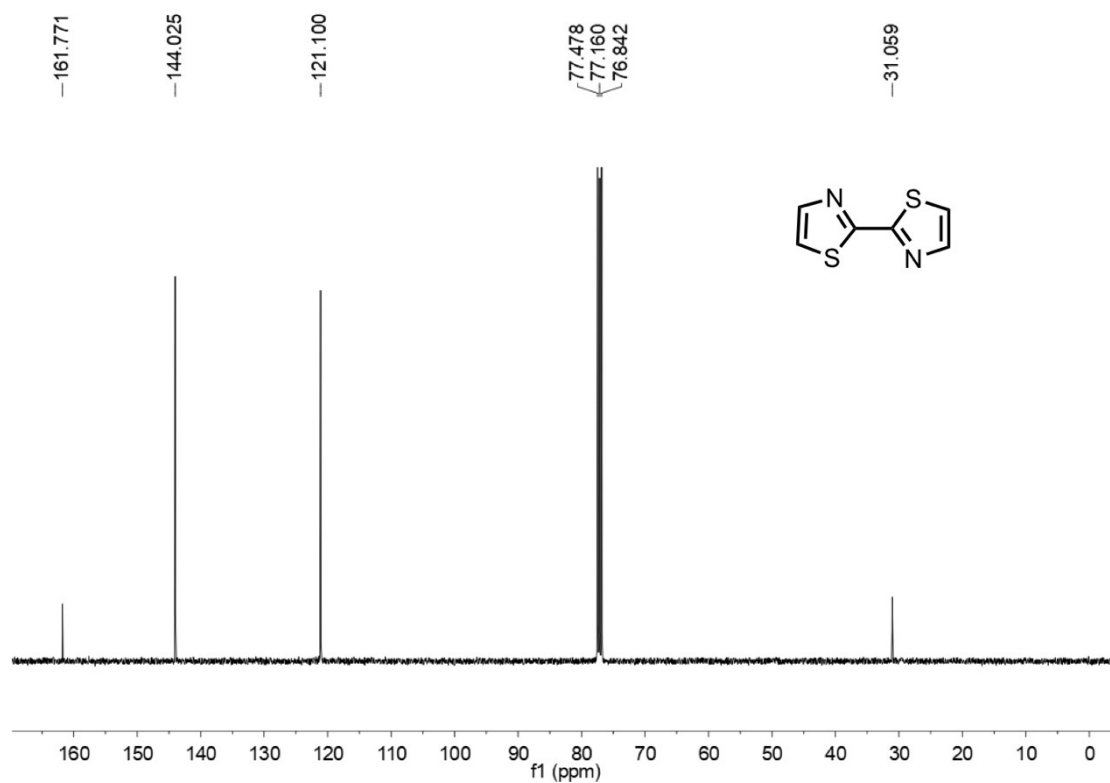

**Figure S5.**  $^{13}\text{C}$  NMR spectrum of 2Tz in  $\text{CDCl}_3$

□

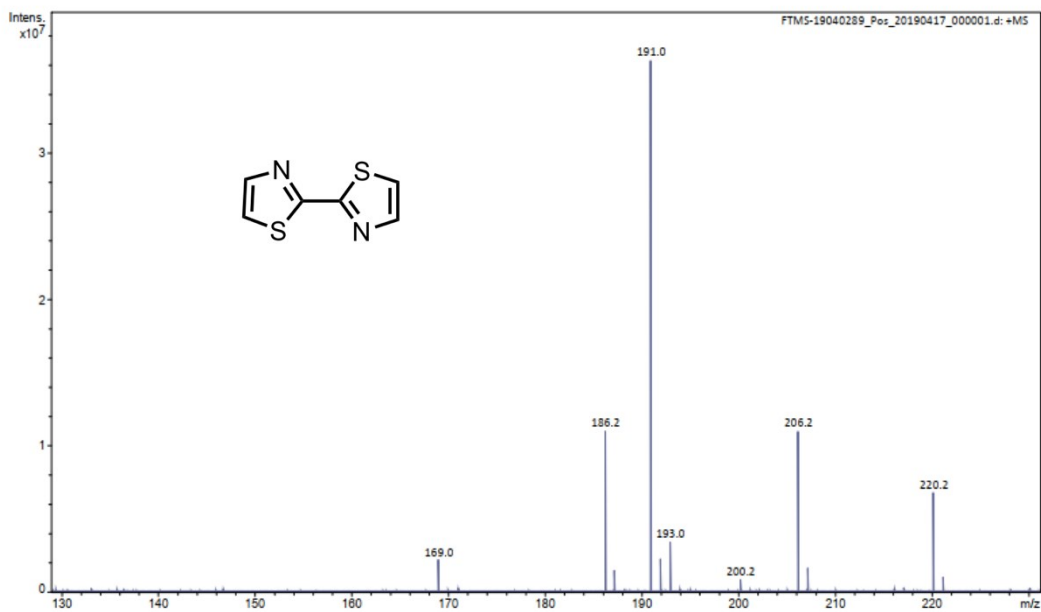

**Figure S6.** Mass spectrum of 2Tz

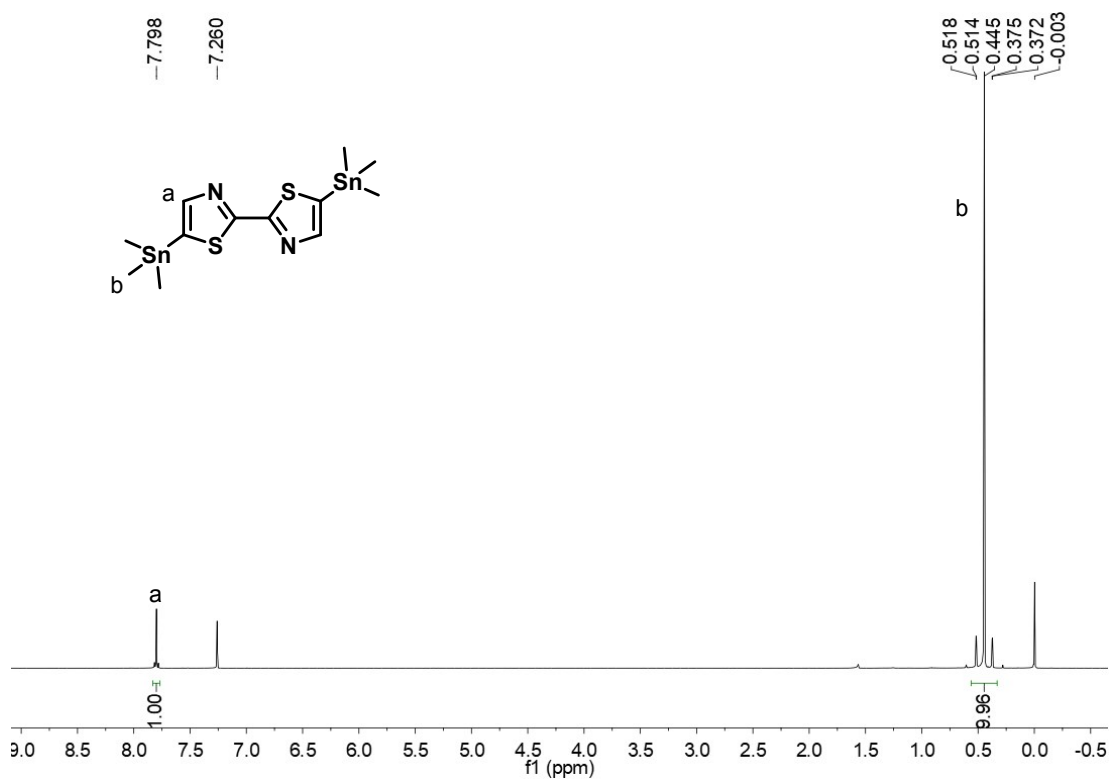

**Figure S7.** <sup>1</sup>H NMR spectrum of Sn-2Tz in CDCl<sub>3</sub>

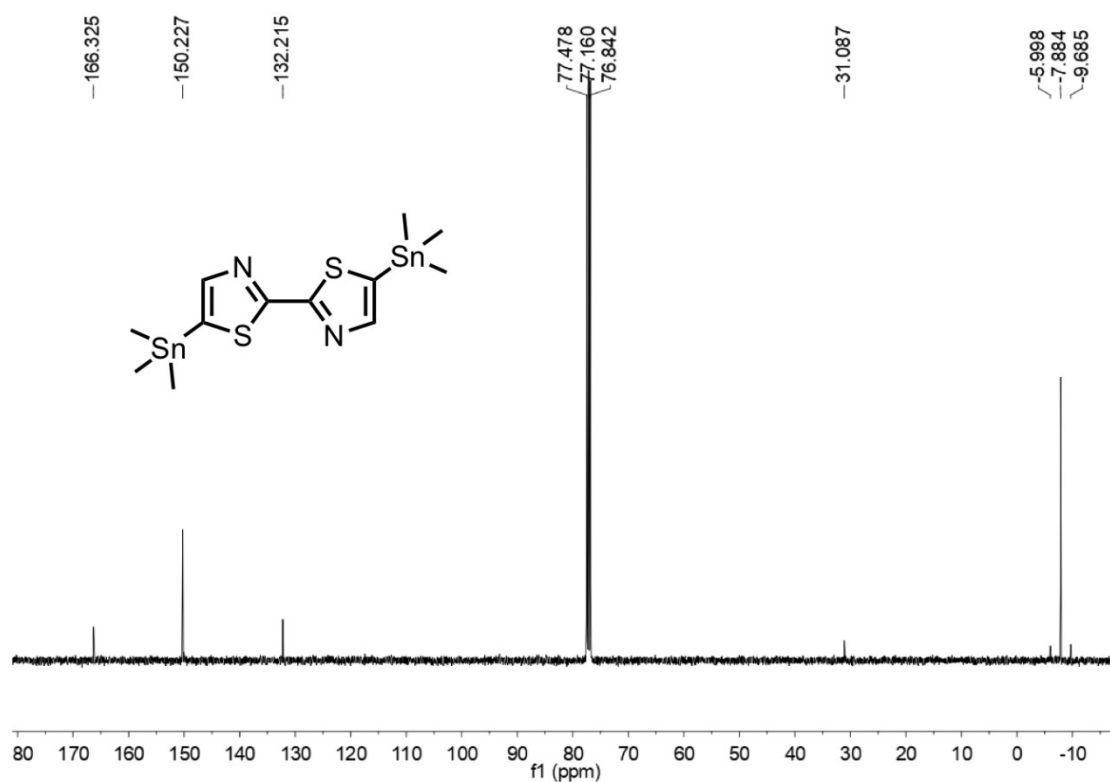

**Figure S8.** <sup>13</sup>C NMR spectrum of Sn-2Tz in CDCl<sub>3</sub>

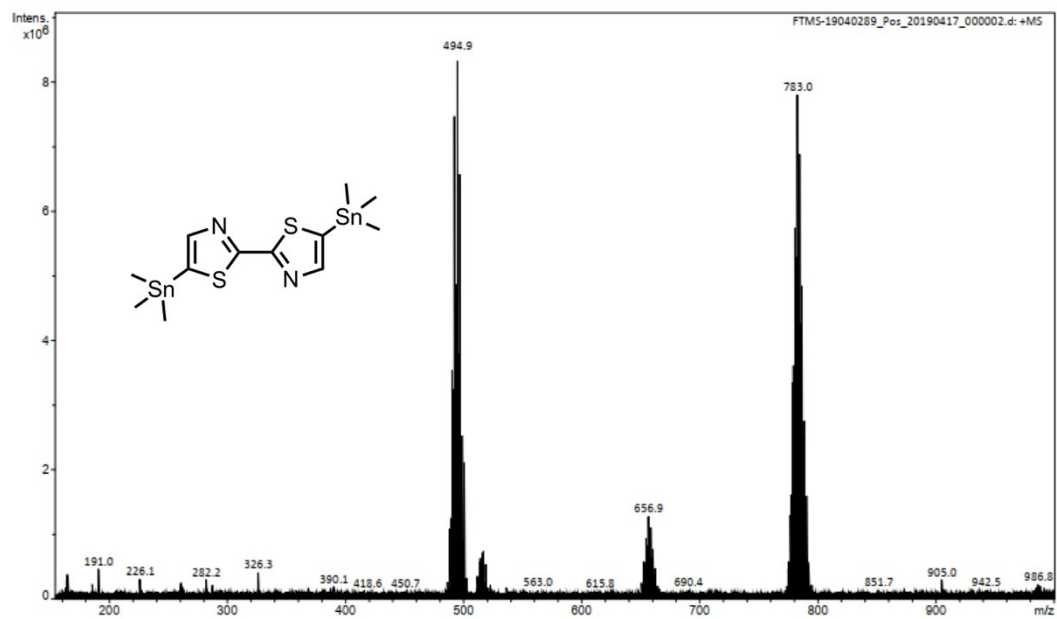

**Figure S9.** Mass spectrum of Sn-2Tz

## Cirrus GPC Sample Peak Report

Generated by: dell

2021年3月22日 15:56

Workbook: D:\Cirrus Workbooks\luyang\luyang.plw

### Sample Details

Sample Name: 8

Acquired: 2019-5-8 3:30:09

By Analyst: dell

Batch Name: 2019-5-8

Filename: D:\Cirrus Workbooks\luyang\2019-5-8-0004.cgrm

Concentration: 0.10 mg/ml

K of Sample: 14.1000

Injection Volume: 200.0 ul

Alpha of Sample: 0.7000

LIMS ID:

Bottle ID:

### Workbook Details

Eluent: TCB

Flow Rate: 1.00 ml/min

Column Set:

Column Set Length: 0 mm

Detector: RI

Temperature: 150

### Analysis Using Method: luyang-2017

Comments:

Results File: D:\Cirrus Workbooks\luyang\2019-5-8-0004-Repeat (02).rst

### Calibration Used: 2017-12-7 19:19:32

Calibration Type: Narrow Standard

Curve Fit Used: 1

Calibration Curve:  $y = 12.627022 - 0.389278x^{\wedge}1$

High Limit MW RT: 17.37 mins

Low Limit MW RT: 23.40 mins

High Limit MW: 735470

Low Limit MW: 3295

K: 14.1000

FRM Name:

Alpha: 0.7000

Flow Marker RT: 0.00 mins

FRCF: 1.0000

### MW Averages

Mp: 46375

Mn: 37467

Mv: 77198

Mw: 86992

Mz: 171243

Mz+1: 258568

PD: 2.3218

### Distribution Plots

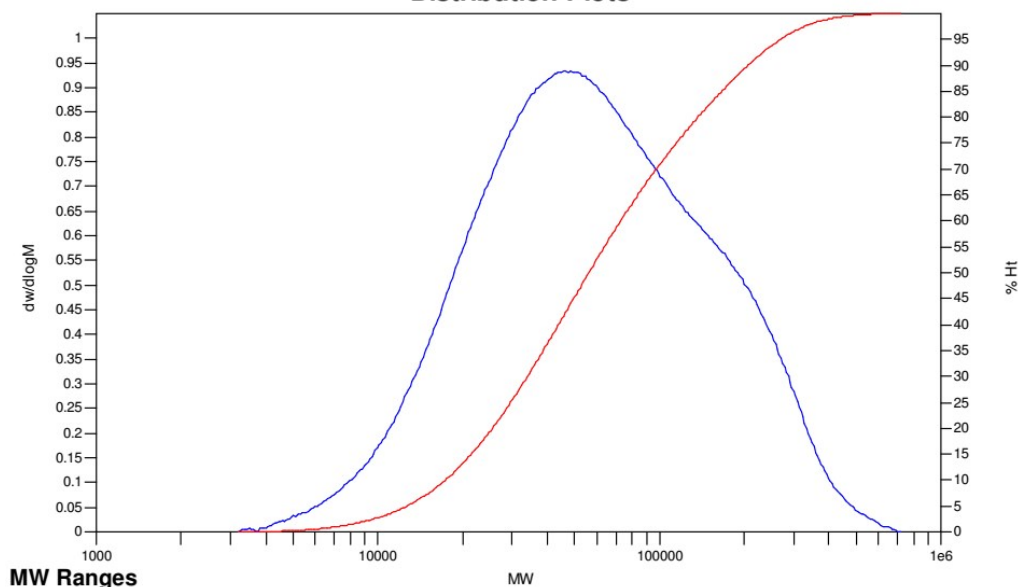

**Figure S10.** Molecular weights and polydispersity index (PDI) of P(PyDPP2OD-2T) measured by high-temperature GPC at 150 °C.



## Cirrus GPC Sample Peak Report

Generated by: dell

2021年3月22日 15:59

Workbook: D:\Cirrus Workbooks\luyang\luyang.plw

### Sample Details

Sample Name: 9

Acquired: 2019-5-8 4:23:01

By Analyst: dell

Batch Name: 2019-5-8

Filename: D:\Cirrus Workbooks\luyang\2019-5-8-0005.cgrm

Concentration: 0.10 mg/ml

K of Sample: 14.1000

Injection Volume: 200.0 ul

Alpha of Sample: 0.7000

LIMS ID:

Bottle ID:

### Workbook Details

Eluent: TCB

Flow Rate: 1.00 ml/min

Column Set:

Column Set Length: 0 mm

Detector: RI

Temperature: 150

### Analysis Using Method: luyang-2017

Comments:

Results File: D:\Cirrus Workbooks\luyang\2019-5-8-0005-Repeat (01).rst

### Calibration Used: 2017-12-7 19:19:32

Calibration Type: Narrow Standard

Curve Fit Used: 1

Calibration Curve:  $y = 12.627022 - 0.389278x^{*1}$

High Limit MW RT: 17.37 mins

Low Limit MW RT: 23.40 mins

High Limit MW: 735470

Low Limit MW: 3295

K: 14.1000

FRM Name:

Alpha: 0.7000

Flow Marker RT: 0.00 mins

FRCF: 1.0000

### MW Averages

Mp: 47073

Mn: 31654

Mv: 72480

Mw: 83340

Mz: 180789

Mz+1: 279648

PD: 2.6328

### Distribution Plots

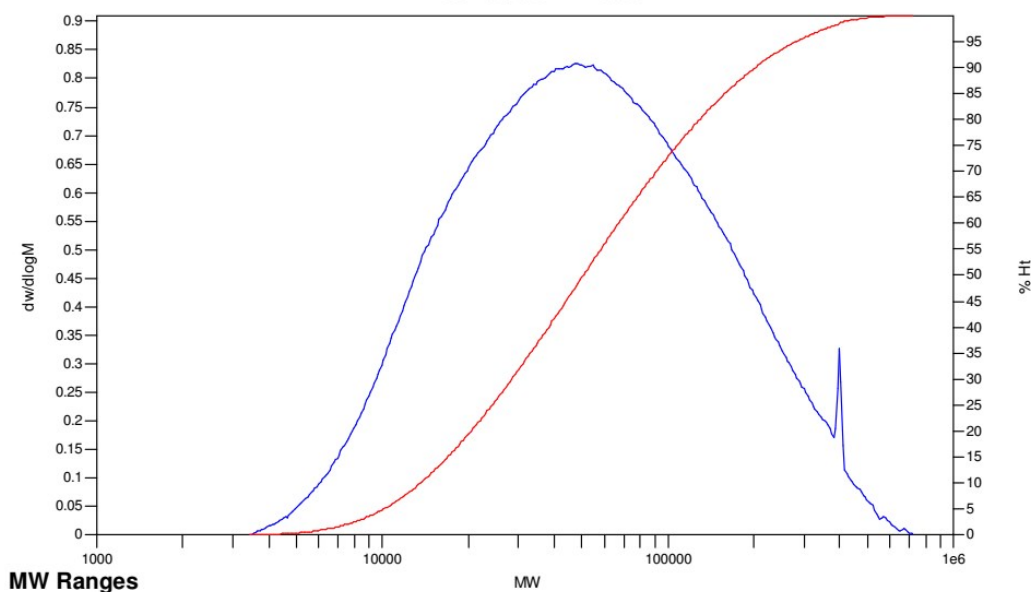

**Figure S11.** Molecular weights and PDI of P(PyDPP2OD-2Tz) measured by high-temperature GPC at 150 °C.
